# Supplementary material for: DOCK5 functions as a key signaling adaptor that links FcεRI signals to microtubule dynamics during mast cell degranulation
Source: PubMed Central journal article supplement — J Exp Med. 2014 Jun 30;211(7):1407–19. doi: 10.1084/jem.20131926 (PMC4076576; doi:10.1084/jem.20131926), 2014-06-30
Supplement: supp_jem.20131926_JEM_20131926_sm.pdf [file supp_jem.20131926_JEM_20131926_sm.pdf]

## SUPPLEMENTAL MATERIAL

Ogawa et al., <http://www.jem.org/cgi/content/full/jem.20131926/DC1>

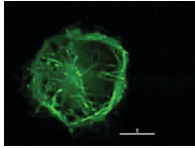

**Video 1. Dynamic nature of the microtubule plus-end in WT, but not *Dock5*<sup>-/-</sup>, BMMCs.** BMMCs expressing GFP-tagged c-APC were sensitized with anti-DNP IgE antibody and then stimulated with DNP-HSA. Images were taken at 2-s intervals for 100 s, and a 10× time-lapse video is shown for WT and *Dock5*<sup>-/-</sup> BMMCs. Images are representative of 18 (for WT) or 20 (*Dock5*<sup>-/-</sup>) BMMCs collected from ten independent experiments. This video is shown at 5 frames/s. Bar, 5 μm.
